# Supplementary material
Source: PubMed Central journal article supplement (PMC5947326)
Supplement: NIHMS964488-supplement-Supplemental.pdf [file NIHMS964488-supplement-Supplemental.pdf]

**Discovery of 2-(1*H*-indol-5-ylamino)-6-(2,4-difluorophenylsulfonyl)-8-methylpyrido[2,3-*d*]pyrimidin-7(8*H*)-one (7ao) as a Potent Selective Inhibitor of Polo Like Kinase 2 (PLK2)**

M. V. Ramana Reddy<sup>1,\*</sup>, Balireddy Akula<sup>2,#</sup>, Shashidhar Jatiani<sup>1,#</sup>, Rodrigo Vasquez-Del Carpio<sup>1,#</sup>, Vinay K. Billa<sup>1,#</sup>, Muralidhar R. Mallireddigari<sup>2,#</sup>, Stephen C. Cosenza<sup>1</sup>, D. R. C. Venkata Subbaiah<sup>1</sup>, E. Vijaya Bharathi<sup>1</sup>, Venkat R. Pallela<sup>2</sup>, Poornima Ramkumar<sup>1</sup>, Rinku Jain<sup>3</sup>, Aneel K. Aggarwal<sup>3</sup>, E. Premkumar Reddy<sup>1,\*</sup>

<sup>1</sup>Department of Oncological Sciences, Icahn School of Medicine at Mount Sinai, 1425 Madison Ave., New York, NY 10029-6514, United States

<sup>2</sup>Department of Medicinal Chemistry, Onconova Therapeutics Inc., 375 Pheasant Run, Newtown, PA 18940-3423, United States

<sup>3</sup>Department of Structural & Chemical Biology, Icahn School of Medicine at Mount Sinai, 1425 Madison Ave., New York, NY 10029-6514, United States

Corresponding Authors

\*For M.V.R.R.: phone, 212-659-6875; fax, 215-893-6989; e-mail, r.reddy@mssm.edu.

\*For E.P.R.: phone, (212) 659-5571; e-mail, ep.reddy@mssm.edu.

## Author Contributions

# B. A., S. J., R.V-D.C., V. B. and M. M. contributed equally.

## Contents:

1. Table 1. Kinase inhibition profile of **7ao** (Reaction Biology Corp) - S3
2. Kinome map for **7ao** -S11

Table 1. Kinase inhibition profile of **7ao** (Reaction Biology Corp)

| Kinase:       | <b>7ao</b><br>IC50 (μM) |
|---------------|-------------------------|
| ABL1          | >10                     |
| ABL2/ARG      | >10                     |
| ACK1          | >10                     |
| AKT1          | >10                     |
| AKT2          | >10                     |
| AKT3          | >10                     |
| ALK           | >10                     |
| ALK1/ACVRL1   | >10                     |
| ALK3/BMPR1A   | >10                     |
| ALK5/TGFBR1   | >10                     |
| ARAF          | >10                     |
| ARK5/NUAK1    | >10                     |
| ASK1/MAP3K5   | >10                     |
| Aurora A      | >10                     |
| Aurora B      | >10                     |
| Aurora C      | >10                     |
| AXL           | >10                     |
| BLK           | >10                     |
| BMPR2         | >10                     |
| BMX/ETK       | >10                     |
| BRAF          | >10                     |
| BRK           | >10                     |
| BRSK1         | >10                     |
| BRSK2         | >10                     |
| BTK           | >10                     |
| c-Kit         | >10                     |
| c-MER         | >10                     |
| c-MET         | >10                     |
| c-Src         | >10                     |
| CAMK1a        | >10                     |
| CAMK1b        | >10                     |
| CAMK1d        | >10                     |
| CAMK1g        | >10                     |
| CAMK2a        | >10                     |
| CAMK2b        | >10                     |
| CAMK2d        | >10                     |
| CAMK2g        | >10                     |
| CAMK4         | >10                     |
| CAMKK1        | >10                     |
| CAMKK2        | >10                     |
| CDC7/DBF4     | >10                     |
| CDK1/cyclin A | >10                     |

|                          |     |
|--------------------------|-----|
| CDK1/cyclin B            | >10 |
| CDK1/cyclin E            | >10 |
| CDK16/cyclin Y (PCTAIRE) | >10 |
| CDK2/cyclin A            | >10 |
| CDK2/Cyclin A1           | >10 |
| CDK2/cyclin E            | >10 |
| CDK3/cyclin E            | >10 |
| CDK4/cyclin D1           | >10 |
| CDK4/cyclin D3           | >10 |
| CDK5/p25                 | >10 |
| CDK5/p35                 | >10 |
| CDK6/cyclin D1           | >10 |
| CDK6/cyclin D3           | >10 |
| CDK7/cyclin H            | >10 |
| CDK9/cyclin K            | >10 |
| CDK9/cyclin T1           | >10 |
| CHK1                     | >10 |
| CHK2                     | >10 |
| CK1a1                    | >10 |
| CK1d                     | >10 |
| CK1epsilon               | >10 |
| CK1g1                    | >10 |
| CK1g2                    | >10 |
| CK1g3                    | >10 |
| CK2a                     | >10 |
| CK2a2                    | >10 |
| CLK1                     | >10 |
| CLK2                     | >10 |
| CLK3                     | >10 |
| CLK4                     | >10 |
| COT1/MAP3K8              | >10 |
| CSK                      | >10 |
| CTK/MATK                 | >10 |
| DAPK1                    | >10 |
| DAPK2                    | >10 |
| DCAMKL1                  | >10 |
| DCAMKL2                  | >10 |
| DDR1                     | >10 |
| DDR2                     | >10 |
| DLK/MAP3K12              | >10 |
| DMPK                     | >10 |
| DMPK2                    | >10 |
| DRAK1/STK17A             | >10 |
| DYRK1/DYRK1A             | >10 |
| DYRK1B                   | >10 |

|             |      |
|-------------|------|
| DYRK2       | >10  |
| DYRK3       | >10  |
| DYRK4       | >10  |
| EGFR        | >10  |
| EPHA1       | >10  |
| EPHA2       | >10  |
| EPHA3       | >10  |
| EPHA4       | >10  |
| EPHA5       | >10  |
| EPHA6       | >5.0 |
| EPHA7       | >10  |
| EPHA8       | >10  |
| EPHB1       | >10  |
| EPHB2       | >10  |
| EPHB3       | >10  |
| EPHB4       | >10  |
| ERBB2/HER2  | >10  |
| ERBB4/HER4  | >10  |
| ERK1        | >10  |
| ERK2/MAPK1  | >10  |
| ERK5/MAPK7  | >10  |
| ERK7/MAPK15 | >10  |
| FAK/PTK2    | >10  |
| FER         | >10  |
| FES/FPS     | >10  |
| FGFR1       | >5.0 |
| FGFR2       | >10  |
| FGFR3       | >5.0 |
| FGFR4       | >10  |
| FGR         | >10  |
| FLT1/VEGFR1 | >10  |
| FLT3        | >5.0 |
| FLT4/VEGFR3 | >10  |
| FMS         | >10  |
| FRK/PTK5    | >10  |
| FYN         | >10  |
| GCK/MAP4K2  | >10  |
| GLK/MAP4K3  | >10  |
| GRK1        | >10  |
| GRK2        | >10  |
| GRK3        | >10  |
| GRK4        | >10  |
| GRK5        | >10  |
| GRK6        | >10  |
| GRK7        | >10  |

|               |      |
|---------------|------|
| GSK3a         | >5.0 |
| GSK3b         | NC   |
| Haspin        | >10  |
| HCK           | >10  |
| HGK/MAP4K4    | >10  |
| HIPK1         | >10  |
| HIPK2         | >10  |
| HIPK3         | >10  |
| HIPK4         | >10  |
| HPK1/MAP4K1   | >10  |
| IGF1R         | >10  |
| IKKa/CHUK     | >10  |
| IKKb/IKBKB    | >10  |
| IKKe/IKBKE    | >10  |
| IR            | >10  |
| IRAK1         | >10  |
| IRAK4         | >10  |
| IRR/INSRR     | >10  |
| ITK           | >10  |
| JAK1          | >10  |
| JAK2          | >10  |
| JAK3          | >10  |
| JNK1          | >10  |
| JNK2          | >10  |
| JNK3          | >10  |
| KDR/VEGFR2    | >10  |
| KHS/MAP4K5    | >10  |
| LATS1         | >10  |
| LATS2         | >10  |
| LCK           | >10  |
| LCK2/ICK      | >10  |
| LIMK1         | >10  |
| LIMK2         | >10  |
| LKB1          | >10  |
| LOK/STK10     | >10  |
| LRRK2         | >10  |
| LYN           | >10  |
| LYN B         | >10  |
| MAPKAPK2      | >10  |
| MAPKAPK3      | >10  |
| MAPKAPK5/PRAK | >10  |
| MARK1         | >10  |
| MARK2/PAR-1Ba | >10  |
| MARK3         | >10  |
| MARK4         | >10  |

|                |      |
|----------------|------|
| MEK1           | >10  |
| MEK2           | >10  |
| MEK3           | >10  |
| MEKK1          | >10  |
| MEKK2          | >10  |
| MEKK3          | >10  |
| MELK           | >10  |
| MINK/MINK1     | >10  |
| MKK4           | >10  |
| MKK6           | >10  |
| MLCK/MYLK      | >10  |
| MLCK2/MYLK2    | >10  |
| MLK1/MAP3K9    | >10  |
| MLK2/MAP3K10   | >10  |
| MLK3/MAP3K11   | >10  |
| MNK1           | >10  |
| MNK2           | >10  |
| MRCKa/CDC42BPA | >10  |
| MRCKb/CDC42BPB | >10  |
| MSK1/RPS6KA5   | >10  |
| MSK2/RPS6KA4   | >10  |
| MSSK1/STK23    | >10  |
| MST1/STK4      | >10  |
| MST2/STK3      | >10  |
| MST3/STK24     | >10  |
| MST4           | >10  |
| MUSK           | >10  |
| MYLK3          | >10  |
| MYO3b          | >10  |
| NEK1           | 0.63 |
| NEK11          | >10  |
| NEK2           | 1.83 |
| NEK3           | >10  |
| NEK4           | >10  |
| NEK5           | 4.42 |
| NEK6           | >10  |
| NEK7           | >10  |
| NEK9           | >5.0 |
| NLK            | >10  |
| OSR1/OXSR1     | >10  |
| P38a/MAPK14    | >10  |
| P38b/MAPK11    | >10  |
| P38d/MAPK13    | >10  |
| P38g           | >10  |
| p70S6K/RPS6KB1 | >10  |

|                 |       |
|-----------------|-------|
| p70S6Kb/RPS6KB2 | >10   |
| PAK1            | >10   |
| PAK2            | >10   |
| PAK3            | >10   |
| PAK4            | >10   |
| PAK5            | >10   |
| PAK6            | >10   |
| PASK            | >10   |
| PBK/TOPK        | >10   |
| PDGFRa          | >10   |
| PDGFRb          | >10   |
| PDK1/PDPK1      | >10   |
| PHKg1           | >10   |
| PHKg2           | >10   |
| PIM1            | >10   |
| PIM2            | >10   |
| PIM3            | >10   |
| PKA             | >10   |
| PKAcb           | >10   |
| PKAcg           | >10   |
| PKCa            | >10   |
| PKCb1           | >10   |
| PKCb2           | >10   |
| PKCd            | >10   |
| PKCepsilon      | >10   |
| PKCeta          | >10   |
| PKCg            | >10   |
| PKCiota         | >10   |
| PKCmu/PRKD1     | >10   |
| PKCnu/PRKD3     | >10   |
| PKCtheta        | >10   |
| PKCzeta         | >10   |
| PKD2/PRKD2      | >10   |
| PKG1a           | >10   |
| PKG1b           | >10   |
| PKG2/PRKG2      | >10   |
| PKN1/PRK1       | >10   |
| PKN2/PRK2       | >10   |
| PKN3/PRK3       | >10   |
| PLK1            | >10   |
| PLK2            | 0.374 |
| PLK3            | >10   |
| PLK4/SAK        | >10   |
| PRKX            | >10   |
| PYK2            | >10   |



|              |      |
|--------------|------|
| RAF1         | >10  |
| RET          | >10  |
| RIPK2        | >10  |
| RIPK3        | >10  |
| RIPK5        | >10  |
| ROCK1        | >10  |
| ROCK2        | >10  |
| RON/MST1R    | >10  |
| ROS/ROS1     | >10  |
| RSK1         | >5.0 |
| RSK2         | >10  |
| RSK3         | >10  |
| RSK4         | >10  |
| SGK1         | >10  |
| SGK2         | >10  |
| SGK3/SGKL    | >10  |
| SIK1         | >10  |
| SIK2         | >10  |
| SIK3         | >10  |
| SLK/STK2     | >10  |
| SNARK/NUAK2  | >10  |
| SRMS         | >10  |
| SRPK1        | >10  |
| SRPK2        | >10  |
| SSTK/TSSK6   | >10  |
| STK16        | >10  |
| STK22D/TSSK1 | >10  |
| STK25/YSK1   | >10  |
| STK32B/YANK2 | >10  |
| STK32C/YANK3 | >10  |
| STK33        | >10  |
| STK38/NDR1   | >10  |
| STK38L/NDR2  | >10  |
| STK39/STLK3  | >10  |
| SYK          | >10  |
| TAK1         | >10  |
| TAOK1        | >10  |
| TAOK2/TAO1   | >10  |
| TAOK3/JIK    | >10  |
| TBK1         | >10  |
| TEC          | >10  |
| TESK1        | >10  |
| TGFBR2       | >10  |
| TIE2/TEK     | >10  |
| TLK1         | >10  |

|              |      |
|--------------|------|
| TLK2         | >10  |
| TNIK         | >5.0 |
| TNK1         | >10  |
| TRKA         | >5.0 |
| TRKB         | >10  |
| TRKC         | >10  |
| TSSK2        | >10  |
| TSSK3/STK22C | >5.0 |
| TTBK1        | >10  |
| TTBK2        | >10  |
| TXK          | >10  |
| TYK1/LTK     | >10  |
| TYK2         | >10  |
| TYRO3/SKY    | >10  |
| ULK1         | >10  |
| ULK2         | >10  |
| ULK3         | >10  |
| VRK1         | >10  |
| VRK2         | >10  |
| WEE1         | >10  |
| WNK1         | >10  |
| WNK2         | >10  |
| WNK3         | >10  |
| YES/YES1     | >10  |
| ZAK/MLTK     | >10  |
| ZAP70        | >10  |
| ZIPK/DAPK3   | >10  |

Figure 1. Kinome map for **7ao**

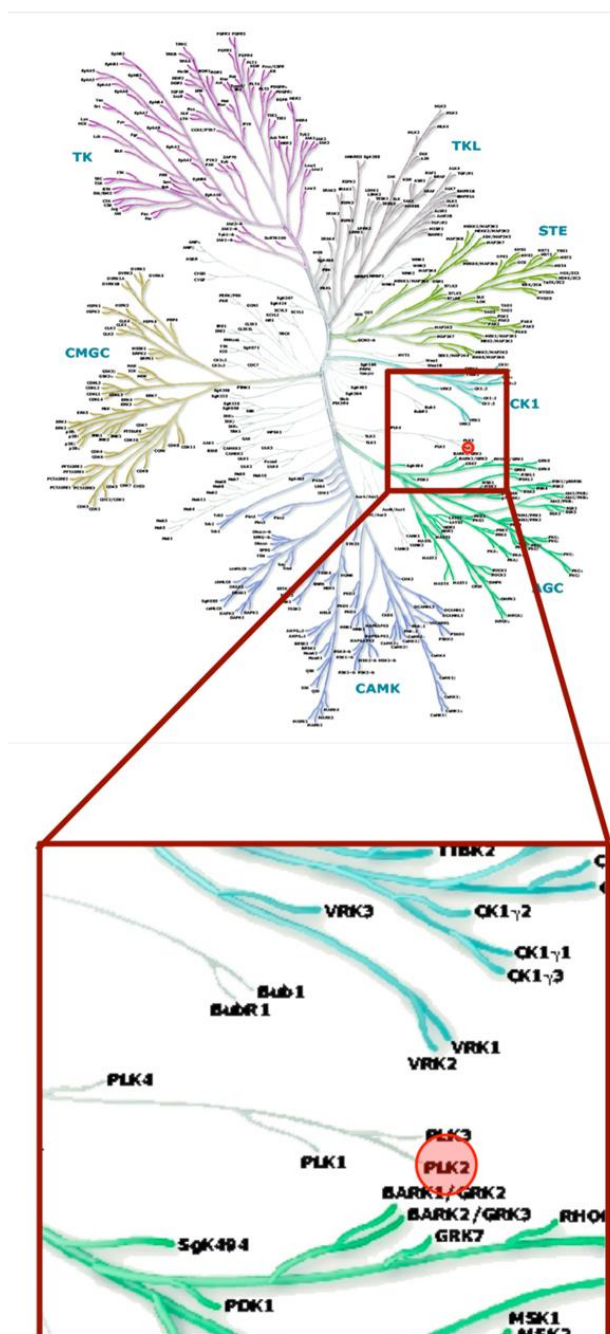

**Figure 1:** Kinase profiling of compound **7ao** was performed using biochemical kinase assays against a panel of 355 functional human kinases (Reaction Biology Corporation). The kinome

tree maps PLK2 as the sole target of **7a0** amongst the kinases tested with an  $IC_{50}$  value of 287 nM.
